## Cardiogenic shock and radial access in patients with an acute ST elevation myocardial infarction

R. Zahn<sup>1</sup>, M. Hochadel<sup>2</sup>, B. Schumacher<sup>3</sup>, M. Pauschinger<sup>4</sup>, C. Stellbrink<sup>5</sup>, V. Schaechinger<sup>6</sup>, S. Behrens<sup>7</sup>, H. Mudra<sup>8</sup>, A. Elsaesser<sup>9</sup>, U. Zeymer<sup>1</sup>

<sup>1</sup>Klinikum Ludwigshafen, Ludwigshafen, Germany; <sup>2</sup>Stiftung Institut, Ludwigshafen, Germany; <sup>3</sup>Westpfalz Hospital, Kaiserslautern, Germany; <sup>4</sup>Klinikum Nuernberg - Sued-Nuernberg, Nuremberg, Germany; <sup>5</sup>Bielefeld Hospital, Bielefeld, Germany; <sup>6</sup>Klinikum Fulda Heart-Thorax-Center Cardiology, Fulda, Germany; <sup>7</sup>Vivantes Humboldt Klinikum, Berlin, Germany; <sup>8</sup>Clinic Neuperlach, Munich, Germany; <sup>9</sup>Clinic Oldenburg, Oldenburg, Germany

On behalf of ALKK

**Funding Acknowledgement:** Type of funding source: None

**Background:** Cardiogenic shock (CS) in patients (pts) with acute ST elevation myocardial infarction (STEMI) is the strongest predictor of hospital mortality. Radial in contrast to femoral access in STEMI pts might be associated with a lower mortality. However, little is known on radial access in CS pts.

**Methods:** We retrospectively analysed all STEMI pts between 2009 and 2015 who suffered from CS and who were included into the ALKK PCI registry. Pts treated via a radial access were compared to those treated via a femoral access.

**Results:** Between 2009 and 2015 23796 STEMI pts were included in the

registry. 1763 (7.4%) of pts were in CS. The proportion of radial access was 6.6%: in 2009 4.0% and in 2015 19.6%, p for trend <0.0001 with a strong variation between the participating centres (0% to 37%).

**Conclusions:** Radial access was only used in 6.6% of STEMI pts presenting in CS. However, a significant increase in the use of radial access was observed over time (2009: 4%, 2015 19.6%, p<0.001), with a great variance in its use between the participating hospitals. Despite similar pt characteristics the difference in hospital mortality according to access site has to be interpreted with caution.

|                                | Radial access (n=111) | Femoral access (n=1589) | p-value |
|--------------------------------|-----------------------|-------------------------|---------|
| Age (years, median, quartiles) | 68.6 (57.8; 77.7)     | 67.6 (56.7; 77.0)       | 0.90    |
| Women                          | 22.5%                 | 29.6%                   | 0.11    |
| Prior myocardial infarction    | 18.8%                 | 26.8%                   | 0.078   |
| Prior stroke/TIA               | 5.3%                  | 9.1%                    | 0.21    |
| Prior PCI                      | 15.4%                 | 18.8%                   | 0.39    |
| Prior coronary bypass surgery  | 2.7%                  | 6.2%                    | 0.13    |
| Diabetes mellitus              | 30.3%                 | 30.6%                   | 0.96    |
| Renal failure                  | 38.1%                 | 36.3%                   | 0.71    |
| Atrial fibrillation            | 13.2%                 | 15.4%                   | 0.63    |
| Current smoker                 | 51.7%                 | 45.3%                   | 0.25    |
| Coronary 3 vessel disease      | 44.1%                 | 46.3%                   | 0.66    |
| Number of treated vessels      | 1.7                   | 1.6                     | 0.081   |
| TIMI III – flow after PCI      | 77.3%                 | 76.3%                   | 0.82    |
| Drug-eluting stent             | 62.4%                 | 41.8%                   | <0.001  |
| Death in the cath lab          | 3.6%                  | 8.1%                    | 0.087   |
| Hospital mortality             | 31.5%                 | 42.1%                   | 0.029   |
| Median hospital stay (days)    | 6 (3, 11)             | 7 (1, 15)               | 0.75    |
